# Supplementary material for: Differential role of MAX2 and strigolactones in pathogen, ozone, and stomatal responses
Source: PubMed Central journal article supplement (PMC7047155; doi:10.1002/pld3.206), 2020-02-28

Supporting Information Figure 4

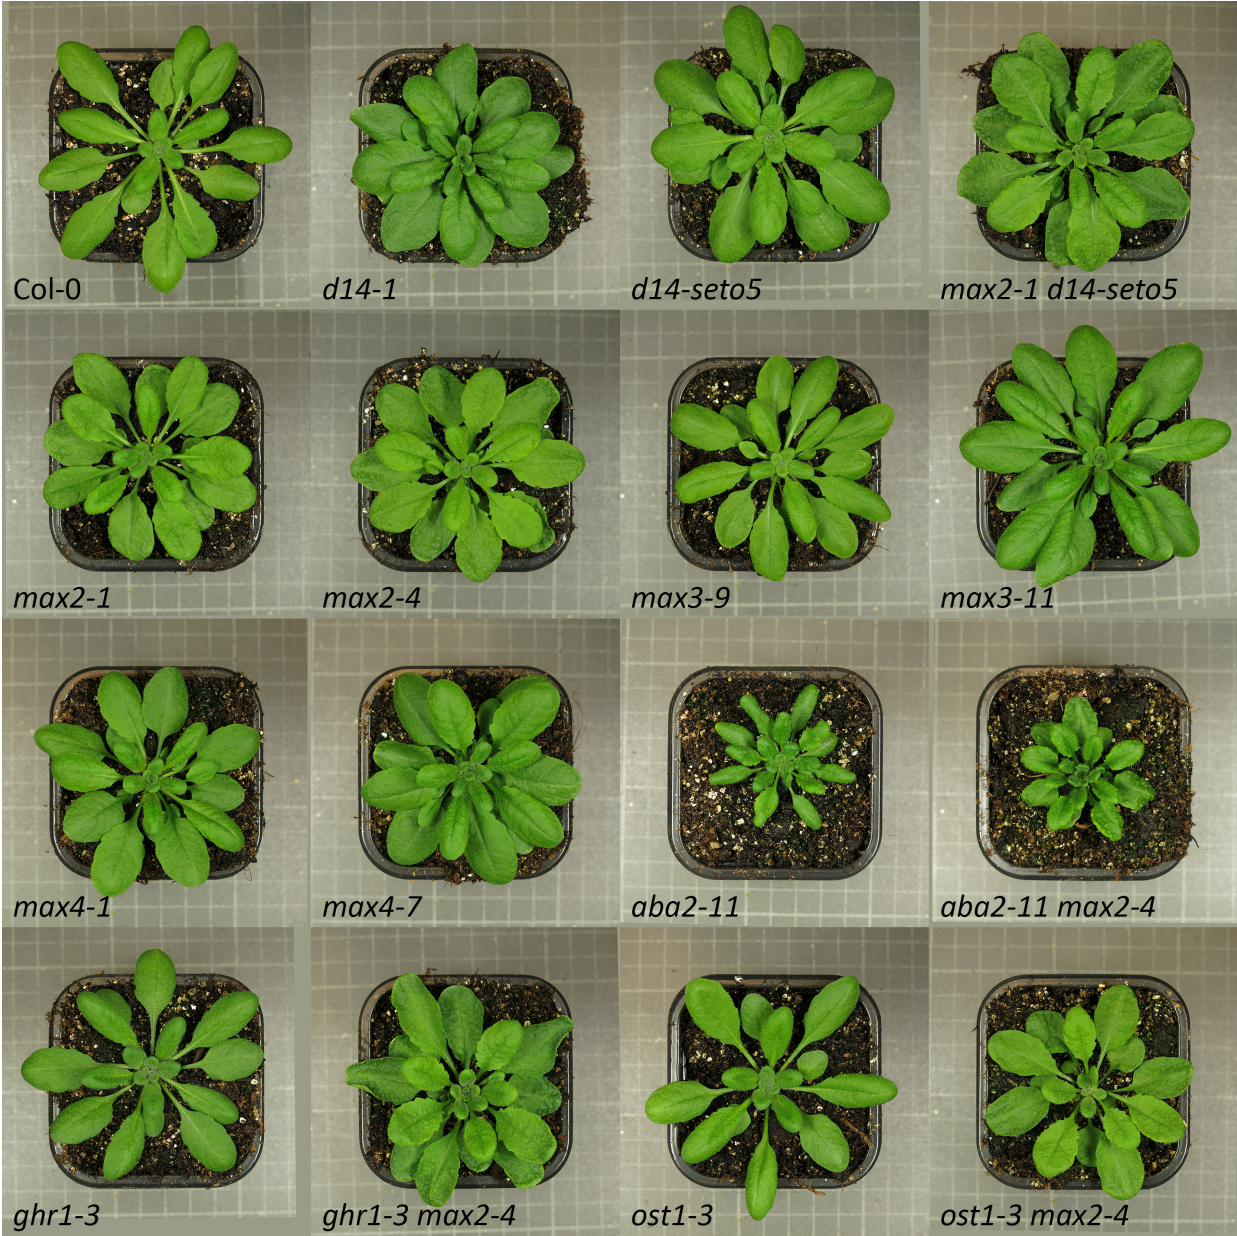

Supplement: PLD3-4-e00206-s004.pdf [file PLD3-4-e00206-s004.pdf]
