# Supplementary material for: Differential role of MAX2 and strigolactones in pathogen, ozone, and stomatal responses
Source: PubMed Central journal article supplement (PMC7047155; doi:10.1002/pld3.206), 2020-02-28
Supplement: PLD3-4-e00206-s006.pdf [file PLD3-4-e00206-s006.pdf]

Supplemental Table 1. Primers used in this study

| Primer name and description | Primer Sequence (5' → 3')     | Comments                                                                                                                |
|-----------------------------|-------------------------------|-------------------------------------------------------------------------------------------------------------------------|
| Genotyping of mutant lines  |                               |                                                                                                                         |
| D14-seto5 F                 | TATGATCGGAATCATCGCTTC         |                                                                                                                         |
| D14-seto5 R                 | GACCTAAGATACTCCGCCACC         |                                                                                                                         |
| D14-1 MW221                 | AAGAATATGGCAAGTGCAAC          | Genomic primer for Atd14-1 allele, Waters et al 2012                                                                    |
| D14-1 MW222                 | GATGATCCGATCATAGCG            | Genomic primer for Atd14-1 allele, Waters et al 2012                                                                    |
| L4_WiscLoxHS                | TGATCCATGTAGATTTCCCGGACATGAAG | T-DNA primer for Atd14-1 allele, Waters et al 2012                                                                      |
| max2-1 F                    | GTTGGAGAATTTTTGACGCCAT        |                                                                                                                         |
| max2-1 R                    | CAAAGGCCGAGCTGTAAGAGA         |                                                                                                                         |
| max2-4 F                    | TACCTCCTGTGCTTCTCCGCTA        | SALK_028336                                                                                                             |
| max2-4 R                    | CTTCTGGCTCCTCTCGTAACCA        | SALK_028336                                                                                                             |
| max3-9 F                    | CCCTCCGGTACATACTACTT          |                                                                                                                         |
| max3-9 R                    | GTAGTGAGTATCCGTGAATGC         |                                                                                                                         |
| max3-11 F                   | CGTTAAACCCAAGCAACGAGAG        | SALK_023975                                                                                                             |
| max3-11 R                   | CATCGGAAACGTCAAATTCCTC        | SALK_023975                                                                                                             |
| max4-1 F                    | AAGGAAAGATACCCACTTGCC         |                                                                                                                         |
| max4-1 R                    | GTACCAACCATGCCTATGACC         |                                                                                                                         |
| SPM8225F                    | TCGGCTTATTTCAAGTAAAGTGT       | SPM8225F transposon insertion primer for max4-1, Sorefan et al 2003                                                     |
| max4-7 F                    | ACTGGTCATAGGCATGTTGGT         | SALK_082552                                                                                                             |
| max4-7 R                    | ACCGAATATCTCAGGGGCATTT        | SALK_082552                                                                                                             |
| aba2-11_F                   | TTGATGTGACAGGCTTTTGG          |                                                                                                                         |
| aba2-11_R                   | TCTTGACAGATCAACAATGCAG        |                                                                                                                         |
| ghr1-3_F                    | TGGCCCTTCTAAGCTGTTAGA         |                                                                                                                         |
| ghr1-3_R                    | CTCCTTATCTGGACCTTTGCC         |                                                                                                                         |
| ost1-3_F                    | CATATCTTTAGACGAGGGGCC         |                                                                                                                         |
| ost1-3_R                    | GTGAGTGGTCCAATGGATTTG         |                                                                                                                         |
| SALK_LBb1.3                 | ATTTTGCCGATTTCCGGAAC          |                                                                                                                         |
| GK_o8474                    | ATAATAACGCTCCGGACATCTACATTT   |                                                                                                                         |
| qPCR primers                |                               |                                                                                                                         |
| YLS8 for                    | TTACTGTTTCGGTTGTTCTCCATTT     | efficiency 1.822                                                                                                        |
| YLS8 rev                    | CACTGAATCATGTTCGAAGCAAGT      |                                                                                                                         |
| PP2AA3 for                  | GCGGTTGTGGAGAACATGATACG       | efficiency 1.854                                                                                                        |
| PP2AA3 rev                  | GAACCAAACACAATTCGTTGCTG       |                                                                                                                         |
| TIP41 for                   | GTGAAAACCTGTTGGAGAGAAGCAA     | efficiency 1.867                                                                                                        |
| TIP41 rev                   | TCAACTGGATACCCTTTCGCA         |                                                                                                                         |
| AXR3-F                      | CACATTGATTGGTGTTAATTGC        | efficiency 1.744                                                                                                        |
| AXR3-R                      | CCAAATCCAGATCAAAACACAG        |                                                                                                                         |
| GRX480 for                  | ACGGAGAGGATGTTGCATGTGTC       | efficiency 1.843                                                                                                        |
| GRX480 rev                  | AATCTCAAGGACCGCCGATTC         |                                                                                                                         |
| PR-1 for                    | CGGAGCTACGCAGAACAAC           | efficiency 1.658                                                                                                        |
| PR-1 rev                    | CTCGCTAACCCACATGTTCA          |                                                                                                                         |
| NCED3 for                   | AGCTCCTTACCTATGGCCAGT         | efficiency 1.968                                                                                                        |
| NCED3 rev                   | CGCTCTCTGGAACAAATTCATC        |                                                                                                                         |
| FRK1 for1                   | CGGTCAGATTTCAACAGTTGTC        | efficiency 1.843, used in GR24 assay (Figure 3a)                                                                        |
| FRK1 rev1                   | AATAGCAGGTTGGCCTGTAATC        |                                                                                                                         |
| FRK1 for2                   | GCCAACGGAGACATTAGAG           | efficiency 1.876, used in P.syringae infection experiment (Figure 3b), primer sequences published by Yeh et al., (2015) |
| FRK1 rev2                   | CCATAACGACCTGACTCATC          |                                                                                                                         |

## References

Yeh Y.H., Chang Y.H., Huang P.Y., Huang J.B., Zimmerli L. 2015. Enhanced Arabidopsis pattern-triggered immunity by overexpression of cysteine-rich receptor-like kinases. *Front. Plant Sci.*, 6:322.
